# Supplementary material for: Gut markers of bodily self-consciousness
Source: bioRxiv or medRxiv preprint supplement (doi:10.1101/2021.03.05.434072), 2021-09-21
Supplement: Supplementary file [file media-1.pdf]

# Supplementary Materials for

## Gut markers of bodily self-consciousness

Alessandro Monti, Giuseppina Porciello, Maria Serena Panasiti, Salvatore Maria Aglioti

Correspondence to: [alessandro.monti@uniroma1.it](mailto:alessandro.monti@uniroma1.it) or [salvatoremaria.aglioti@uniroma1.it](mailto:salvatoremaria.aglioti@uniroma1.it)

### **This PDF file includes:**

Materials and Methods  
Supplementary Text  
Figs. S1 to S5  
Tables S1 to S12  
Caption for Movie S1

### **Other Supplementary Materials for this manuscript include the following:**

Movie S1

## Materials and Methods

### Participants

Thirty-one healthy male subjects aged 20-30 years ( $M = 24.42$ ,  $SD = 2.8$ ) took part in the study after giving their informed consent. No subject had a history of psychiatric or neurologic disorders. A detailed screening procedure ensured that all participants were eligible for ingesting the SmartPill™ without any known contraindication (history of gastric bezoars; history of any abdominal/pelvic surgery within the previous three months; swallowing disorders; suspected or known strictures, fistulas, or physiological/mechanical obstruction within the gastro-intestinal tract; dysphagia to food or pills; Crohn's disease or diverticulitis; body mass index  $\geq 40$ ; and cardiac pacemakers or defibrillators (11)). All subjects were naïve to the purpose of the research and were paid for their participation. The study was approved by the local Institutional Review Board (Fondazione Santa Lucia ethics committee).

### Materials

#### 1. SmartPill™

The gastro-intestinal milieu of each participant was monitored through a SmartPill™ (SmartPill Motility Testing System, Medtronic plc). SmartPills are light, single-use, orally ingestible capsules (length: 26 mm; width: 13 mm; weight: 4.5 g) (**Fig. S1**). Each pill consists of a polyurethane shell fitted with a long-lasting battery ( $> 5$  days), a transmitter (broadcast frequency: 434.2 MHz), and internal sensors probing temperature (range: 20-42 °C; accuracy:  $\pm 1$  °C), intraluminal pressure (range: 0-350 mmHg; accuracy:  $\pm 5$  mmHg in the 0-99 mmHg sub-range,  $\pm 10\%$  of applied pressure in the 100-350 mmHg sub-range) and pH (range: 1-9; accuracy:  $\pm 0.5$  pH units) of the gastro-intestinal (GI) tract.

Before being ingested, the pill is activated through a magnetic fixture and the pH sensor is calibrated through a buffer solution. After ingestion, the capsule samples temperature data every 20 s, pressure every 0.5 s, and pH every 5 s for the first 24 hours; sampling frequencies are halved thereafter. The pill transmitter wirelessly sends these data to an external radio receiver (operating range:  $\sim 1.5$  m), which can be either docked in a dedicated station or comfortably fastened to a belt worn by the participant.

Combining pH, pressure, and temperature information, the MotiliGI software (Medtronic plc) univocally identifies the specific segment of the GI tract in which the pill is located at a given time. The software takes an abrupt increase of  $\geq 2$  pH units as a sign that the pill left the stomach and entered the small intestine. Likewise, the software interprets a subsequent gradual decrease of  $\geq 1$  pH unit for at least 10 consecutive minutes as a sign that the pill left the small intestine and entered the large intestine. If the pH decrease cannot be observed, MotiliGI relies on pressure data to mark the transition between small and large bowel. In our sample, 30 out of 31 subjects displayed a pH increase and decrease as expected, while for the remaining subject the software was still able to localize the GI districts that the pill went through based on the other data.

## 2. Electrogastrography (EGG) and electrocardiography (EKG)

Electrogastrographic (EGG) recordings were used as a measure of gastric contractions. EGG records the electrophysiological activity of a selected cluster of cells at the junction of the enteric nervous system with the stomach – the so-called interstitial cells of Cajal (ICC). ICC act as pacemakers of stomach contractions by generating and propagating electric slow waves that have a normal frequency of 0.05 Hz, i.e. 3 cycles/minute (27, 28). In healthy subjects, each slow wave is coupled to a gastric contraction (18).

Slow wave electrical signals were recorded through a standard 1-channel EGG bipolar montage (18) with 3 pre-gelled disposable Ag/AgCl electrodes. Participants were instructed to lie supine on a deck chair, then their abdominal skin was accurately cleansed to reduce impedance. The first recording electrode was placed halfway between their xyphoid and their umbilicus, while the second recording electrode lay 5 cm up and 5 cm to the left of the first (taking the left side of participants as a reference) and the ground electrode lay on the left costal margin (**Fig. S2**). EGG electrodes were used also to pick electrocardiographic (EKG) signals for the heartbeat counting task (see section 5 below).

## 3. Immersive virtual reality

The immersive virtual reality apparatus for the embreathment illusion (8) included a virtual scenario designed in 3DS Max 2015 (Autodesk Inc) and Unity 2017.1 (Unity Technologies SF). The scenario was broadcasted to a VIVE headset (HTC Corp., 6 degrees of freedom, field of view:  $\sim 110^\circ$ , resolution: 2160x1200 (1080x1200 per eye, aspect ratio 9:5), refresh rate: 90 Hz) and consisted of a life-size room in which a virtual body (avatar) lay on a deck chair.

In the *congruent* condition, the avatar was seen from a first-person perspective, had a human-like appearance, and breathed as the participant, i.e. it inspired when the participant inspired and expired when the participant expired, in real time. The exact alignment of real and virtual breathing was obtained through a customized VIVE sensor (**Movie S1**) that mapped real, respiration-induced belly movements onto the virtual body with sub-millimetric precision (error  $< 10^{-3}$  m).

In the *incongruent* condition, the avatar was seen from a third-person perspective, had a wooden appearance, and breathed in anti-phase with the participant, i.e. it expired when the participant inspired and vice versa, in real time. The same VIVE sensor described above was adopted also in this condition, although in this case the y-axis of the sensor was mapped in a reverse fashion onto the virtual body to further enhance the incongruity effect.

A custom graphical user interface (GUI) was embedded in the virtual scenario, allowing participants to answer some questions relative to bodily self-consciousness (see section 4 below) at the end of each condition. For a detailed footage of the immersive virtual reality experience, please see **Movie S1** below.

#### 4. Measures of bodily self-consciousness

At the end of each virtual reality condition, we administered a customized bodily self-consciousness questionnaire (as in (8)) consisting of five different 0-100 visual analogue scales (VAS). In each scale, participants indicated how much they agreed with a statement by selecting a point on a line ranging from complete disagreement (leftmost point) to complete agreement (rightmost point) through a joystick. **Table S1** shows the complete list of statements.

#### 5. Measures of interoception

*Interoceptive sensibility*, that is, the participant's self-reported ability to monitor interoceptive signals (29), was measured through the Italian version of the Multidimensional Assessment of Interoceptive Awareness (MAIA) (20), a list of 32 questions sampling how much each participant is aware of their physiological state. In particular, the average of three MAIA subscales (*Noticing*, *Attention Regulation*, and *Body Listening*) was taken as a proxy of interoceptive sensibility. Responses were provided with a 6-points Likert scale.

*Interoceptive accuracy*, that is, the participant's objective performance at perceiving interoceptive signals (29), was assessed via Schandry's heartbeat counting task (19). Subjects were asked to report the number of heartbeats they perceived in four different time windows (25 s, 35 s, 45 s, 100 s) without guessing or relying on external cues (e.g. taking their own pulse). Subjective heartbeat counts were then compared with objective EKG recordings to compute an interoceptive accuracy index ranging from 0 (not accurate at all) to 1 (perfect accuracy).

#### Data collection procedure

To ensure that the data gathered by the SmartPill were as reliable as possible, subjects were instructed to discontinue any medication that could interfere with pH values and gastro-intestinal motility (11). Specifically, we checked that none of the participants was assuming any: i) proton pump inhibitors in the seven days before the experiment; ii) antihistamines, prokinetics, antiemetics, anticholinergics, antidiarrheals, narcotic analgesics, and non-steroidal anti-inflammatory drugs in the three days before the experiment; iii) laxatives in the two days before the experiment. Participants were instructed not to take antacids and any alcohol the day before the experiment. Eight hours before the experiment, they also stopped eating and smoking.

The day of the experiment, participants came to the laboratory, filled in the informed consent form, and ate a standardized ~260 kcal breakfast consisting of egg whites (120 g), two slices of bread, and jam (30 g) to make sure that gastro-intestinal transit times of the SmartPill were not affected by meal variability. Meanwhile, we activated the capsule through a magnetic fixture and calibrated the capsule pH sensor (see Materials above, section 1).

After calibration was complete, the pill started transmitting data to the radio receiver. Data came with a relative time stamp indicating the number of seconds elapsed from calibration, but no absolute time reference. To overcome this issue, we synchronized calibration with an external clock that provided us with the required absolute time frame. At that point, participants

swallowed the SmartPill while drinking a glass of water (120 ml). A medical doctor supervised the ingestion procedure to help in case of swallowing problems. All subjects ingested the pill without any trouble. After the ingestion, participants fastened the receiver around their belt and lay supine on a deck chair. This allowed the experimenters to place EGG electrodes according to the montage described above (see Materials, section 2).

When the whole apparatus was in place, we recorded a 15-minute resting-state SmartPill/EGG baseline session in which participants were instructed to relax and keep their eyes open. Then, we perused real-time pH data displayed on the receiver to make sure that the capsule was working and actually lay in the stomach, as signaled by a highly acidic pH (~1-2). After this requirement was fulfilled, we administered a simplified version of the embreathment illusion (8) delivered through a virtual reality headset and a customized breathing sensor (see Materials, section 3).

Both the *congruent* and the *incongruent* condition of the illusion (see above) lasted for 240 s and were followed by the bodily self-consciousness questionnaire described in section 4 of the Materials. The order of experimental conditions was counterbalanced across participants. Conditions were interspersed with 5' washout pauses to avoid carryover effects. Throughout each experimental condition, the receiver logged SmartPill data about the pressure, temperature, and pH of the stomach, while a dedicated amplifier (ADInstruments PowerLab) registered the EGG signal (**Fig. S3**).

As we were interested in assessing the coupling between bodily self-consciousness and the physiology of each main segment of the gastro-intestinal tract, we waited until the pill went through the pylorus (as marked by a  $\geq 2$  pH units sudden increase: see above) to repeat the virtual reality experience. This normally occurred within 2-5 hours from the ingestion of the capsule. At that point, we administered again the embreathment illusion, this time recording small bowel data from both the SmartPill and the EGG. Afterwards, we asked participants to complete the heartbeat counting task (see Materials, section 5). When the capsule entered the large bowel (as marked by a  $\geq 1$  pH unit decrease lasting for at least 10 minutes, typically observed after 2-6 hours from the stomach-small bowel transition: cf. above), we administered the illusion again for the third and last time, always logging SmartPill and EGG data for each experimental condition (**Fig. S3**).

After the first 6 hours from the beginning of the experiment, participants were provided with a meal. After the first 8 hours, they could smoke again. After 3 days, they were allowed to drink alcohol as usual. During the pauses between the stomach and small bowel data collection and between the small and large bowel, subjects filled in the MAIA questionnaire (see Materials, section 5) and then they were free to work or study as they pleased, although they had to avoid strenuous physical exercise. Finally, after the last experimental condition of the large bowel was over, participants could leave the lab. However, they kept the receiver with them, so that they could check the gut physiological parameters for themselves until the capsule stopped transmitting data and was expelled through defecation, ordinarily 10-73 h after ingestion (10).

## Data analysis procedure

### 1. Data pre-processing

Raw SmartPill data were downloaded from the receiver and exported as .txt files. A custom MATLAB algorithm converted relative timestamps in absolute times, so that each event (e.g. beginning and end of each experimental condition) was paired to a definite hh:mm:ss:ms string. We computed the gastric, small bowel, large bowel, and whole gut transit times of the capsule (10) to check whether any subject displayed anomalies in their gastric physiology. 30 out of 31 subject had normal transit times, while the remaining subject had an abnormal large bowel transit time (>> 59 h, cf. (11)). Consequently, his SmartPill data were discarded.

Raw EGG recordings were visually inspected to remove artifacts due to body movements. A 0.016-0.15 Hz bandpass filter removed pink noise and unwanted higher frequencies that are ordinarily associated with cardiac, respiratory, and small bowel activity (cf. (30)). The artifact-free tracings thus obtained were then used to extract the EGG peak frequency for each subject and experimental condition (**Fig. S2**). EGG spectral density was computed using Welch's method on 200 s time windows with 150 s overlap (15). EGG peak frequency was defined as the maximum periodogram peak in the 'normogastric' range, i.e. the range of frequencies that is compatible with the number of stomach contractions in healthy individuals (0.033–0.066 Hz ~ 2-4 cycles per minute; cf. (15)). The whole EGG analysis procedure was performed with BrainVision Analyzer (Brain Products GmbH) and the MATLAB FieldTrip toolbox (31).

Raw EKG recordings were processed in LabChart to detect the QRS complex associated with each heartbeat and thus compute the actual number of heartbeats for each time window of the heartbeat counting task. These objective data were then paired with self-reported numbers of heartbeat for each time window to calculate an interoceptive accuracy score for each participant.

Raw bodily self-consciousness ratings provided by the subjects through the VAS questionnaire in the virtual reality GUI were exported, then matched with the average pH, pressure, temperature, and EGG peak frequency values computed for each participant, each experimental condition, and each gastro-intestinal district (stomach, small bowel, large bowel). The resulting data matrices are available at

[https://osf.io/wecta/?view\\_only=45e1a9e30c2a47efa82c10161b70b732](https://osf.io/wecta/?view_only=45e1a9e30c2a47efa82c10161b70b732)

### 2. Statistical analysis

We used R (version 3.6.1) and the R *lme4* package (32) to perform a linear mixed-effects analysis of the data. We modelled how much ratings of perceived body ownership, agency, location, disembodiment, and two bodies (see above and **Table S1**) changed depending on the experimental conditions, the GI district, and, most importantly, the mean pH, pressure, temperature, and peak frequency values recorded in each experimental condition. We built four distinct mixed-effects models: the first three tested the influence of pH, pressure, and temperature of the three GI districts (stomach, small bowel, and large bowel) over bodily self-consciousness, while the fourth assessed the influence of EGG peak frequencies over bodily self-consciousness.

For the first three models, the dependent variables were the bodily self-consciousness VAS ratings collected when the pill was in the stomach, in the small bowel, and in the large bowel, respectively. For the fourth model, the dependent variable were bodily self-consciousness VAS ratings collected when the pill was in the stomach.

As fixed effects, the first three models had the experimental *condition*, i.e. human-avatar sensory congruency (two levels: congruent and incongruent), the VAS *item* (five levels: perceived ownership, agency, location, disembodiment, and two bodies: see **Table S1**), the individual scores of *interoceptive accuracy* (continuous) and *interoceptive sensibility* (continuous), the condition-specific *pH* (continuous), *pressure* (continuous), and *temperature* (continuous). Also the fourth (EGG) model featured condition, item, accuracy, and sensibility as factors, but replaced pH, pressure, and temperature with condition-specific *EGG peak frequencies*. In all four models fixed effects were tested for interactions with each other.

As random effects, the models included by-condition and by-item random slopes as well as by-subject intercepts. Hence, each mixed model was specified as follows.

Model 1 (SmartPill data, stomach)

$VAS \sim condition * item * (ph + pressure + temperature) * (int. accuracy + int. sensibility) + (condition + item | subject), data = stomach, control = lmerControl(optimizer = "bobyqa")$

Model 2 (SmartPill data, small bowel)

$VAS \sim condition * item * (ph + pressure + temperature) * (int. accuracy + int. sensibility) + (condition + item | subject), data = smallbowel, control = lmerControl(optimizer = "bobyqa")$

Model 3 (SmartPill data, large bowel)

$VAS \sim condition * item * (ph + pressure + temperature) * (int. accuracy + int. sensibility) + (condition + item | subject), data = largebowel, control = lmerControl(optimizer = "bobyqa")$

Model 4 (EGG data, stomach)

$VAS \sim condition * item * egg\ peak\ frequencies * (int. accuracy + int. sensibility) + (condition + item | subject), data = egg.data, control = lmerControl(optimizer = "bobyqa")$

We used the *lmerTest* package (33) to extract p-values through a type II analysis of variance with Satterthwaite's method. Statistically significant interactions were followed up with post-hoc tests of the simple effects involving gut physiological parameters, experimental conditions, and bodily self-consciousness ratings against the null hypothesis of a slope equal to zero. When the significant interactions included a continuous moderator (interoceptive accuracy or sensibility) these post-hoc tests were performed at three spotlight values of the continuous moderator (average and +/- 1 standard deviation values of interoceptive accuracy or sensibility). All post-hoc tests were done through the *emmeans* package to obtain estimated marginal means (EMMs). EMMs were then plotted with the *emmip* function. The standard assumptions and requirements of mixed models (linearity, homoscedasticity, absence of collinearity, and normality of residuals) were assessed through visual inspection of residual plots, the *shapiro.test* function, and the *vif* function. The percentage of variance explained by each mixed-effects model (34) was computed through the *r.squaredGLMM* function of Kamil Bartoń's MuMIn Package.

## Supplementary Text

Please find below an extended technical description of the results presented in the main text.

### 1. SmartPill results – stomach

Model 1 (see above, data analysis procedure, section 2) resulted in a boundary fit, had a marginal  $R^2 = .55$  and a conditional  $R^2 = .85$ . Visual inspection of the plots did not reveal any obvious deviation from homoscedasticity. Residuals were not normally distributed (Shapiro-Wilk normality test,  $W = 0.983$ ,  $p = .005$ ), but linear models are robust against violations of normality (35). As for collinearity, all independent variables had a  $(\text{GVIF}^{1/(2*\text{Df})})^2 < 10$  except for the *pressure* variable  $((\text{GVIF}^{1/(2*\text{Df})})^2 = 34.57)$ .

Type II analysis of variance of Model 1 yielded statistically significant 4-way interactions between condition, item, accuracy, and pH ( $F = 2.9156$ ,  $p = 0.026$ ); between condition, item, accuracy, and pressure ( $F = 3.0095$ ,  $p = 0.024$ ); between condition, item, sensibility, and pressure ( $F = 2.6013$ ,  $p = 0.042$ ); and between condition, item, accuracy, and temperature ( $F = 3.2093$ ,  $p = 0.017$ ) (**Table S2**). The complete post-hoc tests of the 4-way interactions, whose key results are already described in the main text, are presented in **Tables S3-S6**.

Other significant 3-way and 2-way interactions, as well as significant main effects, are listed in **Table S2** and were not further discussed due to the presence of the higher-order, 4-way interactions described above.

### 2. SmartPill results – small bowel

Model 2 (see above, data analysis procedure, section 2) resulted in a boundary fit, had a marginal  $R^2 = .47$  and a conditional  $R^2 = .78$ . Visual inspection of the plots did not reveal any obvious deviation from homoscedasticity. Residuals were normally distributed (Shapiro-Wilk normality test,  $W = 0.991$ ,  $p = 0.111$ ). There were no collinearity issues (for all independent variables,  $(\text{GVIF}^{1/(2*\text{Df})})^2 < 10$ ).

Type II analysis of variance of Model 2 yielded a statistically significant interaction between condition and item ( $F = 23.3875$ ,  $p < 0.001$ ) but no statistically significant effect of pH, pressure, or temperature (**Table S7**). Significant main effects are listed in **Table S7**. The interaction and the main effects were not further discussed since no effect of small bowel physiological signals on bodily self-consciousness ratings was found.

### 3. SmartPill results – large bowel

Model 3 (see above, data analysis procedure, section 2) resulted in a boundary fit, had a marginal  $R^2 = .50$  and a conditional  $R^2 = .79$ . Visual inspection of the plots did not reveal any obvious deviation from homoscedasticity. Residuals were not normally distributed (Shapiro-Wilk normality test,  $W = 0.944$ ,  $p < 0.001$ ) but linear models are robust against violations of normality (35). The *pressure*, *temperature*, and *interoceptive accuracy* variables had a  $\text{GVIF}^{1/(2*\text{Df})})^2$



of 26.32, 10.18, and 10.05, respectively. For all other independent variables  $(GVIF^{1/(2*Df)})^2 < 10$ .

Type II analysis of variance of Model 3 yielded a statistically significant 2-way interaction between pH and accuracy ( $F = 4.8799, p = 0.042$ ) (**Table S8** and **Figure S4**) and a statistically significant 3-way interaction between condition, item, and pH ( $F = 4.5602, p = 0.002$ ) (**Table S8**; see also **Figure 2**).

Other significant effects are listed in **Table S8** and were not further discussed since they did not involve gut signals or due to the presence of a higher-order interaction. Post-hoc tests of the *pH x accuracy* and *condition x item x pH* interactions, whose key results are already described in the main text (see **Figure 2**), are presented in **Tables S9-S10**.

#### 4. Electrogastrography (EGG) results

Model 4 (see above, data analysis procedure, section 2) resulted in a boundary fit, had a marginal  $R^2 = .48$  and a conditional  $R^2 = .77$ . Visual inspection of the plots did not reveal any obvious deviation from homoscedasticity. Residuals were not normally distributed (Shapiro-Wilk normality test,  $W = 0.986, p < 0.024$ ) but linear models are robust against violations of normality (35). For the condition-specific EGG peak frequency variable,  $(GVIF^{1/(2*Df)})^2 = 10.18$ ; for all other independent variables,  $(GVIF^{1/(2*Df)})^2 < 10$ .

Type II analysis of variance of Model 4 yielded a statistically significant 3-way interaction between condition, EGG peak frequency, and interoceptive sensibility ( $F = 9.8104, p = 0.003$ ) (**Table S11**). Other significant effects are listed in **Table S11** and were not further discussed since they did not involve gut signals. Post-hoc tests of the *condition x EGG peak frequency x sensibility* interaction, whose key result is already mentioned in the main text, are presented in **Table S12** and **Figure S5**.

| Construct                | Statement                                                               |
|--------------------------|-------------------------------------------------------------------------|
| <i>p. body ownership</i> | I had the feeling the virtual body/object was mine                      |
| <i>p. body agency</i>    | I had the feeling I controlled the movements of the virtual body/object |
| <i>p. body location</i>  | I had the feeling I occupied the same place of the virtual body/object  |
| <i>p. disembodiment</i>  | I had the feeling I had no body                                         |
| <i>p. two bodies</i>     | I had the feeling I had more than one body                              |

**Table S1.** Bodily self-consciousness questionnaire. *p.*: perceived.

|                                 | <i>Sum Sq</i> | <i>Mean Sq</i> | <i>NumDF</i> | <i>DenDF</i> | <i>F</i> | <i>p</i>    |
|---------------------------------|---------------|----------------|--------------|--------------|----------|-------------|
| condition                       | 9035.1        | 9035.1         | 1            | 11.459       | 42.5370  | < 0.001 *** |
| item                            | 20075.7       | 5018.9         | 4            | 21.118       | 23.6289  | < 0.001 *** |
| ph                              | 3.2           | 3.2            | 1            | 19.494       | 0.0152   | 0.903153    |
| pressure                        | 178.6         | 178.6          | 1            | 30.091       | 0.8409   | 0.366439    |
| temperature                     | 315.0         | 315.0          | 1            | 14.018       | 1.4830   | 0.243413    |
| iacc                            | 696.7         | 696.7          | 1            | 13.945       | 3.2801   | 0.091715    |
| isen                            | 1333.8        | 1333.8         | 1            | 17.440       | 6.2793   | 0.022385 *  |
| condition:item                  | 22504.1       | 5626.0         | 4            | 81.470       | 26.4872  | < 0.001 *** |
| condition:ph                    | 54.7          | 54.7           | 1            | 13.256       | 0.2576   | 0.620120    |
| condition:pressure              | 125.5         | 125.5          | 1            | 15.838       | 0.5907   | 0.453452    |
| condition:temperature           | 386.7         | 386.7          | 1            | 11.745       | 1.8204   | 0.202699    |
| item:ph                         | 5289.5        | 1322.4         | 4            | 30.072       | 6.2257   | < 0.001 *** |
| item:pressure                   | 1746.9        | 436.7          | 4            | 51.924       | 2.0561   | 0.100038    |
| item:temperature                | 2786.4        | 696.6          | 4            | 22.527       | 3.2795   | 0.029283 *  |
| condition:iacc                  | 72.6          | 72.6           | 1            | 11.507       | 0.3416   | 0.570175    |
| condition:isen                  | 96.4          | 96.4           | 1            | 14.687       | 0.4539   | 0.510966    |
| item:iacc                       | 783.8         | 195.9          | 4            | 22.385       | 0.9225   | 0.468372    |
| item:isen                       | 1160.7        | 290.2          | 4            | 27.623       | 1.3662   | 0.271174    |
| ph:iacc                         | 1428.8        | 1428.8         | 1            | 29.460       | 6.7268   | 0.014646 *  |
| ph:isen                         | 402.0         | 402.0          | 1            | 19.687       | 1.8924   | 0.184380    |
| pressure:iacc                   | 86.1          | 86.1           | 1            | 22.852       | 0.4055   | 0.530585    |
| pressure:isen                   | 1.0           | 1.0            | 1            | 27.536       | 0.0046   | 0.946344    |
| temperature:iacc                | 0.1           | 0.1            | 1            | 17.572       | 0.0006   | 0.981351    |
| temperature:isen                | 404.5         | 404.5          | 1            | 17.963       | 1.9045   | 0.184506    |
| condition:item:ph               | 3049.1        | 762.3          | 4            | 82.603       | 3.5887   | 0.009508 ** |
| condition:item:pressure         | 2013.1        | 503.3          | 4            | 82.115       | 2.3694   | 0.059203    |
| condition:item:temperature      | 1329.8        | 332.5          | 4            | 82.147       | 1.5652   | 0.191350    |
| condition:item:iacc             | 2396.9        | 599.2          | 4            | 81.398       | 2.8212   | 0.030205 *  |
| condition:item:isen             | 2967.8        | 741.9          | 4            | 83.991       | 3.4930   | 0.010912 *  |
| condition:ph:iacc               | 0.9           | 0.9            | 1            | 17.749       | 0.0044   | 0.947988    |
| condition:ph:isen               | 177.1         | 177.1          | 1            | 13.563       | 0.8336   | 0.377171    |
| condition:pressure:iacc         | 684.2         | 684.2          | 1            | 24.789       | 3.2212   | 0.084897    |
| condition:pressure:isen         | 482.8         | 482.8          | 1            | 18.870       | 2.2729   | 0.148214    |
| condition:temperature:iacc      | 407.5         | 407.5          | 1            | 15.392       | 1.9187   | 0.185745    |
| condition:temperature:isen      | 510.2         | 510.2          | 1            | 14.800       | 2.4019   | 0.142301    |
| item:ph:iacc                    | 1529.1        | 382.3          | 4            | 48.892       | 1.7997   | 0.144015    |
| item:ph:isen                    | 800.6         | 200.2          | 4            | 29.839       | 0.9423   | 0.453186    |
| item:pressure:iacc              | 2727.4        | 681.9          | 4            | 74.717       | 3.2101   | 0.017316 *  |
| item:pressure:isen              | 1636.1        | 409.0          | 4            | 57.483       | 1.9256   | 0.118425    |
| item:temperature:iacc           | 2267.0        | 566.7          | 4            | 28.429       | 2.6682   | 0.052554    |
| item:temperature:isen           | 78.8          | 19.7           | 4            | 28.515       | 0.0927   | 0.983993    |
| condition:item:ph:iacc          | 2477.1        | 619.3          | 4            | 81.206       | 2.9156   | 0.026239 *  |
| condition:item:ph:isen          | 1569.6        | 392.4          | 4            | 83.525       | 1.8474   | 0.127443    |
| condition:item:pressure:iacc    | 2557.0        | 639.2          | 4            | 65.994       | 3.0095   | 0.024183 *  |
| condition:item:pressure:isen    | 2210.1        | 552.5          | 4            | 78.205       | 2.6013   | 0.042294 *  |
| condition:item:temperature:iacc | 2726.7        | 681.7          | 4            | 83.780       | 3.2093   | 0.016739 *  |
| condition:item:temperature:isen | 416.3         | 104.1          | 4            | 83.611       | 0.4899   | 0.743086    |

**Table S2.** Model 1 type II analysis of variance table with Satterthwaite's method. *iacc*: interoceptive accuracy. *isen*: interoceptive sensibility. Blue rows show interactions that were further analyzed through post-hoc tests. Significance codes: ‘\*\*\*’ < 0.001 ‘\*\*’ < 0.01 ‘\*’ < 0.05

| Low interoceptive accuracy (- 1 S.D.)  |                      |                |           |           |                 |                 |          |          |
|----------------------------------------|----------------------|----------------|-----------|-----------|-----------------|-----------------|----------|----------|
| <i>condition</i>                       | <i>item</i>          | <i>T.trend</i> | <i>SE</i> | <i>df</i> | <i>lower.CL</i> | <i>upper.CL</i> | <i>t</i> | <i>p</i> |
| <i>inc</i>                             | <i>ownership</i>     | -14.45         | 27.3      | 20.0      | -71.398         | 42.49           | -0.529   | 0.6023   |
| <i>cong</i>                            | <i>ownership</i>     | 62.62          | 29.8      | 21.9      | 0.881           | 124.37          | 2.104    | 0.0471*  |
| <i>inc</i>                             | <i>agency</i>        | -36.33         | 34.3      | 19.4      | -108.000        | 35.34           | -1.060   | 0.3023   |
| <i>cong</i>                            | <i>agency</i>        | -28.18         | 33.8      | 22.1      | -98.174         | 41.82           | -0.835   | 0.4129   |
| <i>inc</i>                             | <i>location</i>      | -60.02         | 30.1      | 19.6      | -122.826        | 2.79            | -1.996   | 0.0600   |
| <i>cong</i>                            | <i>location</i>      | 56.15          | 34.0      | 21.7      | -14.356         | 126.66          | 1.653    | 0.1127   |
| <i>inc</i>                             | <i>disembodiment</i> | -46.54         | 28.1      | 20.7      | -105.058        | 11.99           | -1.655   | 0.1130   |
| <i>cong</i>                            | <i>disembodiment</i> | -44.56         | 36.4      | 21.7      | -120.090        | 30.98           | -1.224   | 0.2339   |
| <i>inc</i>                             | <i>twobodies</i>     | 21.74          | 26.8      | 20.8      | -34.088         | 77.56           | 0.810    | 0.4270   |
| <i>cong</i>                            | <i>twobodies</i>     | 6.47           | 36.5      | 21.2      | -69.336         | 82.28           | 0.178    | 0.8608   |
| Average interoceptive accuracy         |                      |                |           |           |                 |                 |          |          |
| <i>condition</i>                       | <i>item</i>          | <i>T.trend</i> | <i>SE</i> | <i>df</i> | <i>lower.CL</i> | <i>upper.CL</i> | <i>t</i> | <i>p</i> |
| <i>inc</i>                             | <i>ownership</i>     | -14.86         | 13.3      | 19.4      | -42.573         | 12.85           | -1.121   | 0.2759   |
| <i>cong</i>                            | <i>ownership</i>     | 19.01          | 12.3      | 19.1      | -6.648          | 44.67           | 1.550    | 0.1375   |
| <i>inc</i>                             | <i>agency</i>        | -8.13          | 16.9      | 18.4      | -43.483         | 27.23           | -0.482   | 0.6353   |
| <i>cong</i>                            | <i>agency</i>        | 3.28           | 14.4      | 17.7      | -27.035         | 33.59           | 0.227    | 0.8228   |
| <i>inc</i>                             | <i>location</i>      | -22.71         | 14.6      | 18.7      | -53.344         | 7.93            | -1.553   | 0.1373   |
| <i>cong</i>                            | <i>location</i>      | 10.42          | 14.5      | 17.9      | -19.972         | 40.81           | 0.720    | 0.4805   |
| <i>inc</i>                             | <i>disembodiment</i> | -36.09         | 13.7      | 19.7      | -64.794         | -7.38           | -2.625   | 0.0164*  |
| <i>cong</i>                            | <i>disembodiment</i> | -41.78         | 15.7      | 17.4      | -74.911         | -8.64           | -2.655   | 0.0164*  |
| <i>inc</i>                             | <i>twobodies</i>     | -2.30          | 13.1      | 20.0      | -29.600         | 25.00           | -0.176   | 0.8621   |
| <i>cong</i>                            | <i>twobodies</i>     | -3.72          | 15.2      | 17.3      | -35.772         | 28.32           | -0.245   | 0.8094   |
| High interoceptive accuracy (+ 1 S.D.) |                      |                |           |           |                 |                 |          |          |
| <i>condition</i>                       | <i>item</i>          | <i>T.trend</i> | <i>SE</i> | <i>df</i> | <i>lower.CL</i> | <i>upper.CL</i> | <i>t</i> | <i>p</i> |
| <i>inc</i>                             | <i>ownership</i>     | -15.27         | 24.4      | 20.3      | -66.015         | 35.48           | -0.627   | 0.5376   |
| <i>cong</i>                            | <i>ownership</i>     | -24.60         | 23.2      | 22.8      | -72.591         | 23.40           | -1.061   | 0.2999   |
| <i>inc</i>                             | <i>agency</i>        | 20.08          | 30.4      | 20.2      | -43.365         | 83.52           | 0.660    | 0.5169   |
| <i>cong</i>                            | <i>agency</i>        | 34.73          | 26.0      | 24.3      | -18.819         | 88.27           | 1.338    | 0.1934   |
| <i>inc</i>                             | <i>location</i>      | 14.61          | 26.8      | 19.9      | -41.360         | 70.57           | 0.545    | 0.5921   |
| <i>cong</i>                            | <i>location</i>      | -35.31         | 26.1      | 23.3      | -89.333         | 18.71           | -1.351   | 0.1896   |
| <i>inc</i>                             | <i>disembodiment</i> | -25.64         | 25.0      | 21.3      | -77.481         | 26.21           | -1.027   | 0.3158   |
| <i>cong</i>                            | <i>disembodiment</i> | -38.99         | 27.8      | 23.7      | -96.450         | 18.46           | -1.402   | 0.1740   |
| <i>inc</i>                             | <i>twobodies</i>     | -26.34         | 24.0      | 21.3      | -76.177         | 23.49           | -1.098   | 0.2843   |
| <i>cong</i>                            | <i>twobodies</i>     | -13.92         | 28.3      | 22.8      | -72.460         | 44.61           | -0.492   | 0.6273   |

**Table S3.** Model 1 post-hoc analysis of the interaction between condition, item, accuracy, and stomach temperature (*T*). *inc*: incongruent condition. *cong*: congruent condition. Degrees-of-freedom (*df*) method: Kenward-Roger. Confidence level (*CL*): 0.95.

| Low interoceptive accuracy (- 1 S.D.)  |                      |                |           |           |                 |                 |          |          |
|----------------------------------------|----------------------|----------------|-----------|-----------|-----------------|-----------------|----------|----------|
| <i>condition</i>                       | <i>item</i>          | <i>P.trend</i> | <i>SE</i> | <i>df</i> | <i>lower.CL</i> | <i>upper.CL</i> | <i>t</i> | <i>p</i> |
| <i>inc</i>                             | <i>ownership</i>     | -1.625         | 5.34      | 24.3      | -12.63          | 9.38            | -0.305   | 0.7633   |
| <i>cong</i>                            | <i>ownership</i>     | 11.089         | 8.21      | 21.4      | -5.96           | 28.14           | 1.351    | 0.1908   |
| <i>inc</i>                             | <i>agency</i>        | 0.414          | 5.61      | 41.8      | -10.92          | 11.75           | 0.074    | 0.9416   |
| <i>cong</i>                            | <i>agency</i>        | 5.087          | 8.62      | 35.2      | -12.40          | 22.57           | 0.590    | 0.5587   |
| <i>inc</i>                             | <i>location</i>      | -2.132         | 5.72      | 26.8      | -13.86          | 9.60            | -0.373   | 0.7121   |
| <i>cong</i>                            | <i>location</i>      | 12.994         | 8.76      | 24.9      | -5.05           | 31.03           | 1.484    | 0.1504   |
| <i>inc</i>                             | <i>disembodiment</i> | -6.297         | 4.97      | 29.9      | -16.45          | 3.86            | -1.266   | 0.2152   |
| <i>cong</i>                            | <i>disembodiment</i> | 10.460         | 8.95      | 35.2      | -7.70           | 28.62           | 1.169    | 0.2502   |
| <i>inc</i>                             | <i>twobodies</i>     | -2.573         | 4.87      | 20.5      | -12.71          | 7.56            | -0.529   | 0.6026   |
| <i>cong</i>                            | <i>twobodies</i>     | -5.501         | 9.80      | 29.3      | -25.53          | 14.53           | -0.562   | 0.5787   |
| Average interoceptive accuracy         |                      |                |           |           |                 |                 |          |          |
| <i>condition</i>                       | <i>item</i>          | <i>P.trend</i> | <i>SE</i> | <i>df</i> | <i>lower.CL</i> | <i>upper.CL</i> | <i>t</i> | <i>p</i> |
| <i>inc</i>                             | <i>ownership</i>     | 1.183          | 8.27      | 24.8      | -15.86          | 18.23           | 0.143    | 0.8875   |
| <i>cong</i>                            | <i>ownership</i>     | -6.193         | 7.01      | 22.4      | -20.72          | 8.34            | -0.883   | 0.3866   |
| <i>inc</i>                             | <i>agency</i>        | 20.212         | 8.87      | 40.8      | 2.29            | 38.13           | 2.278    | 0.0280*  |
| <i>cong</i>                            | <i>agency</i>        | 0.808          | 7.47      | 34.4      | -14.36          | 15.97           | 0.108    | 0.9144   |
| <i>inc</i>                             | <i>location</i>      | 14.086         | 8.89      | 27.2      | -4.14           | 32.31           | 1.585    | 0.1245   |
| <i>cong</i>                            | <i>location</i>      | -5.608         | 7.64      | 26.1      | -21.31          | 10.10           | -0.734   | 0.4696   |
| <i>inc</i>                             | <i>disembodiment</i> | -22.435        | 7.79      | 30.8      | -38.34          | -6.53           | -2.878   | 0.0072** |
| <i>cong</i>                            | <i>disembodiment</i> | -2.214         | 7.78      | 34.7      | -18.01          | 13.59           | -0.285   | 0.7777   |
| <i>inc</i>                             | <i>twobodies</i>     | 0.560          | 7.60      | 22.4      | -15.19          | 16.31           | 0.074    | 0.9420   |
| <i>cong</i>                            | <i>twobodies</i>     | 2.650          | 8.39      | 28.3      | -14.52          | 19.82           | 0.316    | 0.7543   |
| High interoceptive accuracy (+ 1 S.D.) |                      |                |           |           |                 |                 |          |          |
| <i>condition</i>                       | <i>item</i>          | <i>P.trend</i> | <i>SE</i> | <i>df</i> | <i>lower.CL</i> | <i>upper.CL</i> | <i>t</i> | <i>p</i> |
| <i>inc</i>                             | <i>ownership</i>     | 3.991          | 17.48     | 24.7      | -32.03          | 40.01           | 0.228    | 0.8213   |
| <i>cong</i>                            | <i>ownership</i>     | -23.476        | 13.91     | 21.7      | -52.35          | 5.40            | -1.687   | 0.1058   |
| <i>inc</i>                             | <i>agency</i>        | 40.011         | 18.68     | 41.1      | 2.28            | 77.74           | 2.141    | 0.0382*  |
| <i>cong</i>                            | <i>agency</i>        | -3.471         | 14.67     | 35.1      | -33.26          | 26.32           | -0.237   | 0.8144   |
| <i>inc</i>                             | <i>location</i>      | 30.303         | 18.76     | 27.2      | -8.17           | 68.78           | 1.615    | 0.1178   |
| <i>cong</i>                            | <i>location</i>      | -24.210        | 14.95     | 25.4      | -54.98          | 6.56            | -1.619   | 0.1178   |
| <i>inc</i>                             | <i>disembodiment</i> | -38.573        | 16.44     | 30.7      | -72.12          | -5.02           | -2.346   | 0.0256*  |
| <i>cong</i>                            | <i>disembodiment</i> | -14.887        | 15.25     | 35.1      | -45.83          | 16.06           | -0.976   | 0.3355   |
| <i>inc</i>                             | <i>twobodies</i>     | 3.692          | 16.03     | 22.1      | -29.54          | 36.92           | 0.230    | 0.8199   |
| <i>cong</i>                            | <i>twobodies</i>     | 10.801         | 16.61     | 29.0      | -23.18          | 44.78           | 0.650    | 0.5207   |

**Table S4.** Model 1 post-hoc analysis of the interaction between condition, item, accuracy, and stomach pressure (*P*). Symbols and abbreviations as in Table S2. Degrees-of-freedom method: Kenward-Roger. Confidence level: 0.95.

| Low interoceptive sensibility (- 1 S.D.)  |                      |                |           |           |                 |                 |          |          |
|-------------------------------------------|----------------------|----------------|-----------|-----------|-----------------|-----------------|----------|----------|
| <i>condition</i>                          | <i>item</i>          | <i>P.trend</i> | <i>SE</i> | <i>df</i> | <i>lower.CL</i> | <i>upper.CL</i> | <i>t</i> | <i>p</i> |
| <i>inc</i>                                | <i>ownership</i>     | 9.410          | 20.28     | 24.8      | -32.38          | 51.20           | 0.464    | 0.6468   |
| <i>cong</i>                               | <i>ownership</i>     | -19.424        | 15.10     | 22.1      | -50.74          | 11.89           | -1.286   | 0.2117   |
| <i>inc</i>                                | <i>agency</i>        | 45.536         | 21.81     | 40.6      | 1.48            | 89.60           | 2.088    | 0.0431*  |
| <i>cong</i>                               | <i>agency</i>        | -3.122         | 16.00     | 34.8      | -35.62          | 29.37           | -0.195   | 0.8464   |
| <i>inc</i>                                | <i>location</i>      | 32.484         | 21.79     | 27.3      | -12.21          | 77.18           | 1.491    | 0.1476   |
| <i>cong</i>                               | <i>location</i>      | -19.207        | 16.35     | 25.8      | -52.83          | 14.42           | -1.175   | 0.2509   |
| <i>inc</i>                                | <i>disembodiment</i> | -40.291        | 19.14     | 30.9      | -79.33          | -1.25           | -2.105   | 0.0435*  |
| <i>cong</i>                               | <i>disembodiment</i> | -8.877         | 16.65     | 35.0      | -42.68          | 24.92           | -0.533   | 0.5973   |
| <i>inc</i>                                | <i>twobodies</i>     | 7.199          | 18.66     | 22.6      | -31.43          | 45.83           | 0.386    | 0.7032   |
| <i>cong</i>                               | <i>twobodies</i>     | 13.847         | 18.05     | 28.7      | -23.08          | 50.78           | 0.767    | 0.4492   |
| Average interoceptive sensibility         |                      |                |           |           |                 |                 |          |          |
| <i>condition</i>                          | <i>item</i>          | <i>P.trend</i> | <i>SE</i> | <i>df</i> | <i>lower.CL</i> | <i>upper.CL</i> | <i>t</i> | <i>p</i> |
| <i>inc</i>                                | <i>ownership</i>     | 1.290          | 9.14      | 24.8      | -17.55          | 20.13           | 0.141    | 0.8890   |
| <i>cong</i>                               | <i>ownership</i>     | -8.240         | 7.49      | 22.3      | -23.75          | 7.27            | -1.101   | 0.2828   |
| <i>inc</i>                                | <i>agency</i>        | 22.180         | 9.81      | 40.8      | 2.37            | 41.99           | 2.262    | 0.0291*  |
| <i>cong</i>                               | <i>agency</i>        | 0.326          | 7.96      | 34.5      | -15.84          | 16.49           | 0.041    | 0.9676   |
| <i>inc</i>                                | <i>location</i>      | 15.785         | 9.82      | 27.2      | -4.35           | 35.92           | 1.607    | 0.1195   |
| <i>cong</i>                               | <i>location</i>      | -7.835         | 8.14      | 26.1      | -24.57          | 8.90            | -0.962   | 0.3449   |
| <i>inc</i>                                | <i>disembodiment</i> | -24.142        | 8.61      | 30.8      | -41.71          | -6.57           | -2.803   | 0.0087** |
| <i>cong</i>                               | <i>disembodiment</i> | -3.828         | 8.29      | 34.8      | -20.67          | 13.01           | -0.462   | 0.6472   |
| <i>inc</i>                                | <i>twobodies</i>     | 0.773          | 8.40      | 22.4      | -16.64          | 18.18           | 0.092    | 0.9275   |
| <i>cong</i>                               | <i>twobodies</i>     | 3.432          | 8.95      | 28.4      | -14.89          | 21.76           | 0.383    | 0.7043   |
| High interoceptive sensibility (+ 1 S.D.) |                      |                |           |           |                 |                 |          |          |
| <i>condition</i>                          | <i>item</i>          | <i>P.trend</i> | <i>SE</i> | <i>df</i> | <i>lower.CL</i> | <i>upper.CL</i> | <i>t</i> | <i>p</i> |
| <i>inc</i>                                | <i>ownership</i>     | -6.831         | 7.86      | 24.3      | -23.05          | 9.38            | -0.869   | 0.3934   |
| <i>cong</i>                               | <i>ownership</i>     | 2.943          | 5.10      | 23.1      | -7.60           | 13.49           | 0.577    | 0.5693   |
| <i>inc</i>                                | <i>agency</i>        | -1.177         | 9.00      | 33.5      | -19.48          | 17.12           | -0.131   | 0.8967   |
| <i>cong</i>                               | <i>agency</i>        | 3.773          | 5.49      | 32.6      | -7.39           | 14.94           | 0.688    | 0.4964   |
| <i>inc</i>                                | <i>location</i>      | -0.915         | 8.57      | 25.6      | -18.54          | 16.71           | -0.107   | 0.9158   |
| <i>cong</i>                               | <i>location</i>      | 3.537          | 5.61      | 26.7      | -7.98           | 15.06           | 0.630    | 0.5339   |
| <i>inc</i>                                | <i>disembodiment</i> | -7.993         | 7.62      | 29.8      | -23.56          | 7.58            | -1.049   | 0.3028   |
| <i>cong</i>                               | <i>disembodiment</i> | 1.221          | 5.75      | 33.1      | -10.48          | 12.93           | 0.212    | 0.8332   |
| <i>inc</i>                                | <i>twobodies</i>     | -5.653         | 7.55      | 24.7      | -21.21          | 9.91            | -0.749   | 0.4611   |
| <i>cong</i>                               | <i>twobodies</i>     | -6.984         | 6.12      | 27.5      | -19.53          | 5.56            | -1.141   | 0.2636   |

**Table S5.** Model 1 post-hoc analysis of the interaction between condition, item, sensibility, and stomach pressure (*P*). *inc*: incongruent condition. *cong*: congruent condition. Degrees-of-freedom method: Kenward-Roger. Confidence level: 0.95.

| Low interoceptive accuracy (- 1 S.D.)  |                      |                    |           |                 |                 |          |          |           |
|----------------------------------------|----------------------|--------------------|-----------|-----------------|-----------------|----------|----------|-----------|
| <i>condition</i>                       | <i>item</i>          | <i>pH.trend SE</i> | <i>df</i> | <i>lower.CL</i> | <i>upper.CL</i> | <i>t</i> | <i>p</i> |           |
| <i>inc</i>                             | <i>ownership</i>     | 36.99              | 24.36     | 24.6            | -13.22          | 87.20    | 1.518    | 0.1417    |
| <i>cong</i>                            | <i>ownership</i>     | 47.74              | 24.66     | 23.2            | -3.27           | 98.74    | 1.935    | 0.0652    |
| <i>inc</i>                             | <i>agency</i>        | 25.68              | 27.51     | 35.7            | -30.12          | 81.48    | 0.934    | 0.3568    |
| <i>cong</i>                            | <i>agency</i>        | -8.18              | 26.53     | 32.4            | -62.20          | 45.84    | -0.308   | 0.7598    |
| <i>inc</i>                             | <i>location</i>      | 16.93              | 26.48     | 26.2            | -37.48          | 71.34    | 0.639    | 0.5282    |
| <i>cong</i>                            | <i>location</i>      | 41.65              | 27.03     | 26.8            | -13.84          | 97.13    | 1.541    | 0.1351    |
| <i>inc</i>                             | <i>disembodiment</i> | 52.46              | 23.44     | 30.5            | 4.62            | 100.29   | 2.238    | 0.0327*   |
| <i>cong</i>                            | <i>disembodiment</i> | 17.17              | 27.90     | 32.7            | -39.60          | 73.95    | 0.616    | 0.5424    |
| <i>inc</i>                             | <i>twobodies</i>     | 16.66              | 23.24     | 24.4            | -31.27          | 64.59    | 0.717    | 0.4802    |
| <i>cong</i>                            | <i>twobodies</i>     | 34.94              | 29.65     | 27.7            | -25.81          | 95.70    | 1.179    | 0.2485    |
| Average interoceptive accuracy         |                      |                    |           |                 |                 |          |          |           |
| <i>condition</i>                       | <i>item</i>          | <i>pH.trend SE</i> | <i>df</i> | <i>lower.CL</i> | <i>upper.CL</i> | <i>t</i> | <i>p</i> |           |
| <i>inc</i>                             | <i>ownership</i>     | 10.91              | 9.42      | 23.5            | -8.56           | 30.38    | 1.158    | 0.2586    |
| <i>cong</i>                            | <i>ownership</i>     | 10.64              | 10.40     | 23.3            | -10.87          | 32.15    | 1.023    | 0.3169    |
| <i>inc</i>                             | <i>agency</i>        | 6.14               | 11.07     | 28.9            | -16.51          | 28.78    | 0.554    | 0.5836    |
| <i>cong</i>                            | <i>agency</i>        | 1.03               | 11.47     | 27.7            | -22.47          | 24.53    | 0.090    | 0.9290    |
| <i>inc</i>                             | <i>location</i>      | 22.71              | 10.31     | 24.3            | 1.46            | 43.97    | 2.204    | 0.0372*   |
| <i>cong</i>                            | <i>location</i>      | 7.45               | 11.71     | 25.6            | -16.64          | 31.54    | 0.636    | 0.5304    |
| <i>inc</i>                             | <i>disembodiment</i> | -1.52              | 9.30      | 27.7            | -20.58          | 17.53    | -0.164   | 0.8712    |
| <i>cong</i>                            | <i>disembodiment</i> | -9.28              | 12.20     | 28.1            | -34.26          | 15.71    | -0.760   | 0.4533    |
| <i>inc</i>                             | <i>twobodies</i>     | -1.12              | 9.12      | 24.6            | -19.93          | 17.68    | -0.123   | 0.9032    |
| <i>cong</i>                            | <i>twobodies</i>     | 7.48               | 12.60     | 24.8            | -18.47          | 33.44    | 0.594    | 0.5578    |
| High interoceptive accuracy (+ 1 S.D.) |                      |                    |           |                 |                 |          |          |           |
| <i>condition</i>                       | <i>item</i>          | <i>pH.trend SE</i> | <i>df</i> | <i>lower.CL</i> | <i>upper.CL</i> | <i>t</i> | <i>p</i> |           |
| <i>inc</i>                             | <i>ownership</i>     | -15.16             | 14.43     | 23.6            | -44.98          | 14.65    | -1.051   | 0.3041    |
| <i>cong</i>                            | <i>ownership</i>     | -26.46             | 16.97     | 22.9            | -61.58          | 8.67     | -1.559   | 0.1328    |
| <i>inc</i>                             | <i>agency</i>        | -13.41             | 16.91     | 29.1            | -47.99          | 21.18    | -0.793   | 0.4343    |
| <i>cong</i>                            | <i>agency</i>        | 10.24              | 18.14     | 33.4            | -26.64          | 47.13    | 0.565    | 0.5760    |
| <i>inc</i>                             | <i>location</i>      | 28.50              | 15.77     | 24.4            | -4.02           | 61.03    | 1.807    | 0.0831    |
| <i>cong</i>                            | <i>location</i>      | -26.75             | 18.45     | 26.7            | -64.63          | 11.13    | -1.450   | 0.1588    |
| <i>inc</i>                             | <i>disembodiment</i> | -55.50             | 14.22     | 27.8            | -84.63          | -26.37   | -3.904   | 0.0005*** |
| <i>cong</i>                            | <i>disembodiment</i> | -35.73             | 19.01     | 33.7            | -74.38          | 2.92     | -1.879   | 0.0689    |
| <i>inc</i>                             | <i>twobodies</i>     | -18.91             | 13.95     | 24.7            | -47.66          | 9.85     | -1.355   | 0.1876    |
| <i>cong</i>                            | <i>twobodies</i>     | -19.98             | 20.36     | 28.3            | -61.67          | 21.71    | -0.981   | 0.3349    |

**Table S6.** Model 1 post-hoc analysis of the interaction between condition, item, accuracy, and stomach pH. *inc*: incongruent condition. *cong*: congruent condition. Degrees-of-freedom method: Kenward-Roger. Confidence level: 0.95.

|                                 | <i>Sum Sq</i> | <i>Mean Sq</i> | <i>NumDF</i> | <i>DenDF</i> | <i>F</i> | <i>p</i> |     |
|---------------------------------|---------------|----------------|--------------|--------------|----------|----------|-----|
| condition                       | 9930.1        | 9930.1         | 1            | 20.116       | 31.0816  | < 0.001  | *** |
| item                            | 16300.3       | 4075.1         | 4            | 17.902       | 12.7552  | < 0.001  | *** |
| ph                              | 668.8         | 668.8          | 1            | 22.292       | 2.0934   | 0.1619   |     |
| pressure                        | 88.8          | 88.8           | 1            | 46.711       | 0.2781   | 0.6005   |     |
| temperature                     | 19.1          | 19.1           | 1            | 16.647       | 0.0599   | 0.8097   |     |
| iacc                            | 333.9         | 333.9          | 1            | 18.625       | 1.0451   | 0.3197   |     |
| isen                            | 1059.7        | 1059.7         | 1            | 17.933       | 3.3169   | 0.0853   |     |
| condition:item                  | 29887.8       | 7472.0         | 4            | 77.294       | 23.3875  | < 0.001  | *** |
| condition:ph                    | 56.6          | 56.6           | 1            | 18.276       | 0.1772   | 0.6787   |     |
| condition:pressure              | 54.6          | 54.6           | 1            | 21.164       | 0.1710   | 0.6834   |     |
| condition:temperature           | 180.3         | 180.3          | 1            | 26.358       | 0.5644   | 0.4591   |     |
| item:ph                         | 1790.7        | 447.7          | 4            | 22.142       | 1.4012   | 0.2661   |     |
| item:pressure                   | 627.0         | 156.7          | 4            | 37.519       | 0.4906   | 0.7426   |     |
| item:temperature                | 139.5         | 34.9           | 4            | 20.233       | 0.1092   | 0.9779   |     |
| condition:iacc                  | 10.4          | 10.4           | 1            | 21.636       | 0.0325   | 0.8585   |     |
| condition:isen                  | 62.9          | 62.9           | 1            | 22.770       | 0.1969   | 0.6615   |     |
| item:iacc                       | 1015.5        | 253.9          | 4            | 21.568       | 0.7947   | 0.5416   |     |
| item:isen                       | 1007.2        | 251.8          | 4            | 21.000       | 0.7881   | 0.5458   |     |
| ph:iacc                         | 0.0           | 0.0            | 1            | 30.954       | 0.0001   | 0.9934   |     |
| ph:isen                         | 82.9          | 82.9           | 1            | 21.978       | 0.2595   | 0.6156   |     |
| pressure:iacc                   | 0.1           | 0.1            | 1            | 44.209       | 0.0002   | 0.9900   |     |
| pressure:isen                   | 25.9          | 25.9           | 1            | 44.871       | 0.0811   | 0.7771   |     |
| temperature:iacc                | 311.9         | 311.9          | 1            | 17.518       | 0.9763   | 0.3366   |     |
| temperature:isen                | 156.1         | 156.1          | 1            | 16.519       | 0.4887   | 0.4942   |     |
| condition:item:ph               | 2683.8        | 670.9          | 4            | 76.827       | 2.1001   | 0.0889   |     |
| condition:item:pressure         | 1597.6        | 399.4          | 4            | 79.362       | 1.2502   | 0.2967   |     |
| condition:item:temperature      | 1135.2        | 283.8          | 4            | 80.287       | 0.8883   | 0.4749   |     |
| condition:item:iacc             | 516.0         | 129.0          | 4            | 78.434       | 0.4038   | 0.8054   |     |
| condition:item:isen             | 1146.3        | 286.6          | 4            | 80.630       | 0.8970   | 0.4698   |     |
| condition:ph:iacc               | 599.8         | 599.8          | 1            | 20.964       | 1.8773   | 0.1851   |     |
| condition:ph:isen               | 805.0         | 805.0          | 1            | 27.303       | 2.5196   | 0.1240   |     |
| condition:pressure:iacc         | 8.8           | 8.8            | 1            | 26.758       | 0.0277   | 0.8691   |     |
| condition:pressure:isen         | 140.5         | 140.5          | 1            | 27.111       | 0.4399   | 0.5128   |     |
| condition:temperature:iacc      | 159.6         | 159.6          | 1            | 22.832       | 0.4994   | 0.4869   |     |
| condition:temperature:isen      | 360.8         | 360.8          | 1            | 21.406       | 1.1293   | 0.2998   |     |
| item:ph:iacc                    | 165.3         | 41.3           | 4            | 30.085       | 0.1293   | 0.9705   |     |
| item:ph:isen                    | 666.3         | 166.6          | 4            | 27.907       | 0.5214   | 0.7207   |     |
| item:pressure:iacc              | 402.1         | 100.5          | 4            | 38.270       | 0.3147   | 0.8664   |     |
| item:pressure:isen              | 700.5         | 175.1          | 4            | 41.971       | 0.5481   | 0.7014   |     |
| item:temperature:iacc           | 914.4         | 228.6          | 4            | 20.134       | 0.7155   | 0.5911   |     |
| item:temperature:isen           | 579.0         | 144.7          | 4            | 19.539       | 0.4530   | 0.7690   |     |
| condition:item:ph:iacc          | 953.3         | 238.3          | 4            | 79.467       | 0.7459   | 0.5636   |     |
| condition:item:ph:isen          | 840.6         | 210.2          | 4            | 79.819       | 0.6578   | 0.6231   |     |
| condition:item:pressure:iacc    | 406.0         | 101.5          | 4            | 80.234       | 0.3177   | 0.8653   |     |
| condition:item:pressure:isen    | 451.0         | 112.7          | 4            | 79.466       | 0.3529   | 0.8413   |     |
| condition:item:temperature:iacc | 589.5         | 147.4          | 4            | 77.462       | 0.4613   | 0.7639   |     |
| condition:item:temperature:isen | 772.1         | 193.0          | 4            | 76.480       | 0.6042   | 0.6608   |     |

**Table S7.** Model 2 type II analysis of variance table with Satterthwaite's method. *iacc*: interoceptive accuracy. *isen*: interoceptive sensibility. Significance codes as in table S2.



|                                 | <i>Sum Sq</i> | <i>Mean Sq</i> | <i>NumDF</i> | <i>DenDF</i> | <i>F</i> | <i>p</i>    |
|---------------------------------|---------------|----------------|--------------|--------------|----------|-------------|
| condition                       | 10710.1       | 10710.1        | 1            | 16.182       | 36.1729  | < 0.001 *** |
| item                            | 16920.4       | 4230.1         | 4            | 15.317       | 14.2869  | < 0.001 *** |
| ph                              | 664.8         | 664.8          | 1            | 17.156       | 2.2452   | 0.152205    |
| pressure                        | 269.2         | 269.2          | 1            | 21.235       | 0.9094   | 0.351015    |
| temperature                     | 33.8          | 33.8           | 1            | 14.786       | 0.1143   | 0.740069    |
| iacc                            | 593.2         | 593.2          | 1            | 14.224       | 2.0036   | 0.178444    |
| isen                            | 1420.5        | 1420.5         | 1            | 14.581       | 4.7978   | 0.045195 *  |
| condition:item                  | 24109.8       | 6027.5         | 4            | 71.362       | 20.3574  | < 0.001 *** |
| condition:ph                    | 183.1         | 183.1          | 1            | 19.908       | 0.6185   | 0.440862    |
| condition:pressure              | 0.4           | 0.4            | 1            | 22.545       | 0.0015   | 0.969731    |
| condition:temperature           | 59.0          | 59.0           | 1            | 20.310       | 0.1991   | 0.660140    |
| item:ph                         | 1991.8        | 497.9          | 4            | 18.629       | 1.6818   | 0.196487    |
| item:pressure                   | 2893.9        | 723.5          | 4            | 22.645       | 2.4435   | 0.075938    |
| item:temperature                | 2157.2        | 539.3          | 4            | 16.859       | 1.8214   | 0.171606    |
| condition:iacc                  | 13.7          | 13.7           | 1            | 17.408       | 0.0462   | 0.832236    |
| condition:isen                  | 48.7          | 48.7           | 1            | 20.448       | 0.1643   | 0.689398    |
| item:iacc                       | 458.2         | 114.5          | 4            | 15.768       | 0.3869   | 0.814846    |
| item:isen                       | 297.2         | 74.3           | 4            | 16.601       | 0.2510   | 0.905001    |
| ph:iacc                         | 1444.9        | 1444.9         | 1            | 15.606       | 4.8799   | 0.042494 *  |
| ph:isen                         | 167.6         | 167.6          | 1            | 30.834       | 0.5662   | 0.457499    |
| pressure:iacc                   | 36.4          | 36.4           | 1            | 28.329       | 0.1230   | 0.728422    |
| pressure:isen                   | 778.8         | 778.8          | 1            | 37.549       | 2.6302   | 0.113214    |
| temperature:iacc                | 1.2           | 1.2            | 1            | 15.630       | 0.0040   | 0.950313    |
| temperature:isen                | 131.6         | 131.6          | 1            | 15.106       | 0.4446   | 0.514973    |
| condition:item:ph               | 5400.7        | 1350.2         | 4            | 74.311       | 4.5602   | 0.002389 ** |
| condition:item:pressure         | 847.7         | 211.9          | 4            | 74.591       | 0.7158   | 0.583780    |
| condition:item:temperature      | 923.9         | 231.0          | 4            | 75.988       | 0.7801   | 0.541588    |
| condition:item:iacc             | 169.2         | 42.3           | 4            | 73.052       | 0.1429   | 0.965594    |
| condition:item:isen             | 376.1         | 94.0           | 4            | 76.185       | 0.3176   | 0.865386    |
| condition:ph:iacc               | 1147.8        | 1147.8         | 1            | 20.071       | 3.8767   | 0.062923    |
| condition:ph:isen               | 9.0           | 9.0            | 1            | 27.944       | 0.0303   | 0.863165    |
| condition:pressure:iacc         | 516.4         | 516.4          | 1            | 22.556       | 1.7440   | 0.199875    |
| condition:pressure:isen         | 33.6          | 33.6           | 1            | 24.481       | 0.1133   | 0.739253    |
| condition:temperature:iacc      | 378.2         | 378.2          | 1            | 15.085       | 1.2773   | 0.276052    |
| condition:temperature:isen      | 250.9         | 250.9          | 1            | 18.550       | 0.8476   | 0.369059    |
| item:ph:iacc                    | 997.6         | 249.4          | 4            | 16.808       | 0.8423   | 0.517594    |
| item:ph:isen                    | 1163.1        | 290.8          | 4            | 29.297       | 0.9821   | 0.432500    |
| item:pressure:iacc              | 1948.1        | 487.0          | 4            | 26.435       | 1.6449   | 0.192566    |
| item:pressure:isen              | 1269.2        | 317.3          | 4            | 31.314       | 1.0717   | 0.387068    |
| item:temperature:iacc           | 1369.0        | 342.3          | 4            | 16.257       | 1.1560   | 0.366032    |
| item:temperature:isen           | 1085.8        | 271.4          | 4            | 16.638       | 0.9168   | 0.477230    |
| condition:item:ph:iacc          | 819.6         | 204.9          | 4            | 75.308       | 0.6921   | 0.599729    |
| condition:item:ph:isen          | 432.6         | 108.2          | 4            | 76.938       | 0.3653   | 0.832620    |
| condition:item:pressure:iacc    | 1323.7        | 330.9          | 4            | 76.565       | 1.1177   | 0.354426    |
| condition:item:pressure:isen    | 528.2         | 132.1          | 4            | 75.399       | 0.4460   | 0.774958    |
| condition:item:temperature:iacc | 1211.1        | 302.8          | 4            | 68.879       | 1.0226   | 0.401891    |
| condition:item:temperature:isen | 453.7         | 113.4          | 4            | 74.610       | 0.3831   | 0.820053    |

**Table S8.** Model 3 type II analysis of variance table with Satterthwaite's method. *iacc*: interoceptive accuracy. *isen*: interoceptive sensibility. Blue rows show interactions that were further analyzed through post-hoc tests. Significance codes as in Table S2.

| <i>accuracy</i>       | <i>pH.trend</i> | <i>SE</i> | <i>df</i> | <i>lower.CL</i> | <i>upper.CL</i> | <i>t</i> | <i>p</i> |
|-----------------------|-----------------|-----------|-----------|-----------------|-----------------|----------|----------|
| <i>low (-1 S.D.)</i>  | 24.88           | 9.64      | 16.3      | 4.48            | 45.3            | 2.581    | 0.0199*  |
| <i>average</i>        | 9.89            | 5.28      | 17.7      | -1.23           | 21.0            | 1.871    | 0.0779   |
| <i>high (+1 S.D.)</i> | -5.11           | 7.42      | 15.9      | -20.85          | 10.6            | -0.688   | 0.5015   |

**Table S9.** Model 3 post-hoc analysis of the interaction between large bowel pH and pressure. Degrees-of-freedom method: Kenward-Roger. Confidence level: 0.95.

| <i>condition</i> | <i>item</i>          | <i>pH.trend</i> | <i>SE</i> | <i>df</i> | <i>lower.CL</i> | <i>upper.CL</i> | <i>t</i> | <i>p</i> |
|------------------|----------------------|-----------------|-----------|-----------|-----------------|-----------------|----------|----------|
| <i>inc</i>       | <i>ownership</i>     | 12.57           | 7.91      | 24.4      | -3.739          | 28.9            | 1.589    | 0.1249   |
| <i>cong</i>      | <i>ownership</i>     | 19.51           | 9.03      | 22.9      | 0.825           | 38.2            | 2.160    | 0.0414*  |
| <i>inc</i>       | <i>agency</i>        | 11.97           | 9.74      | 23.0      | -8.179          | 32.1            | 1.229    | 0.2315   |
| <i>cong</i>      | <i>agency</i>        | 17.44           | 11.87     | 21.4      | -7.212          | 42.1            | 1.470    | 0.1562   |
| <i>inc</i>       | <i>location</i>      | -16.23          | 10.86     | 21.7      | -38.769         | 6.3             | -1.495   | 0.1492   |
| <i>cong</i>      | <i>location</i>      | 14.50           | 10.74     | 22.1      | -7.766          | 36.8            | 1.351    | 0.1906   |
| <i>inc</i>       | <i>disembodiment</i> | 13.81           | 7.30      | 24.9      | -1.239          | 28.8            | 1.890    | 0.0704   |
| <i>cong</i>      | <i>disembodiment</i> | 1.88            | 7.50      | 24.6      | -13.579         | 17.3            | 0.251    | 0.8037   |
| <i>inc</i>       | <i>twobodies</i>     | 10.65           | 7.63      | 24.3      | -5.094          | 26.4            | 1.395    | 0.1756   |
| <i>cong</i>      | <i>twobodies</i>     | -6.54           | 8.12      | 23.7      | -23.302         | 10.2            | -0.805   | 0.4288   |

**Table S10.** Model 3 post-hoc analysis of the interaction between condition, item and large bowel pH. Degrees-of-freedom method: Kenward-Roger. Confidence level: 0.95.

|                             | <i>Sum Sq</i> | <i>Mean Sq</i> | <i>NumDF</i> | <i>DenDF</i> | <i>F</i> | <i>p</i>    |
|-----------------------------|---------------|----------------|--------------|--------------|----------|-------------|
| condition                   | 22990.3       | 22990.3        | 1            | 18.927       | 79.8001  | < 0.001 *** |
| item                        | 11507.4       | 2876.9         | 4            | 24.933       | 9.9857   | < 0.001 *** |
| eggcond                     | 62.5          | 62.5           | 1            | 42.549       | 0.2168   | 0.643859    |
| iacc                        | 3404.4        | 3404.4         | 1            | 19.693       | 11.8167  | 0.002651 ** |
| isen                        | 1709.3        | 1709.3         | 1            | 19.939       | 5.9330   | 0.024370 *  |
| condition:item              | 24902.4       | 6225.6         | 4            | 104.056      | 21.6092  | < 0.001 *** |
| condition:eggcond           | 332.4         | 332.4          | 1            | 43.656       | 1.1539   | 0.288635    |
| item:eggcond                | 1005.4        | 251.3          | 4            | 72.061       | 0.8724   | 0.484810    |
| condition:iacc              | 85.5          | 85.5           | 1            | 22.510       | 0.2967   | 0.591333    |
| condition:isen              | 5.8           | 5.8            | 1            | 19.172       | 0.0200   | 0.888886    |
| item:iacc                   | 1326.9        | 331.7          | 4            | 28.248       | 1.1515   | 0.352954    |
| item:isen                   | 1518.2        | 379.5          | 4            | 29.056       | 1.3174   | 0.286858    |
| eggcond:iacc                | 263.3         | 263.3          | 1            | 42.132       | 0.9139   | 0.344529    |
| eggcond:isen                | 922.1         | 922.1          | 1            | 35.358       | 3.2007   | 0.082178    |
| condition:item:eggcond      | 2020.0        | 505.0          | 4            | 76.493       | 1.7528   | 0.147131    |
| condition:item:iacc         | 2016.8        | 504.2          | 4            | 107.523      | 1.7501   | 0.144345    |
| condition:item:isen         | 1761.9        | 440.5          | 4            | 104.794      | 1.5289   | 0.199143    |
| condition:eggcond:iacc      | 6.2           | 6.2            | 1            | 43.086       | 0.0215   | 0.884230    |
| condition:eggcond:isen      | 2826.4        | 2826.4         | 1            | 44.433       | 9.8104   | 0.003068 ** |
| item:eggcond:iacc           | 618.1         | 154.5          | 4            | 78.110       | 0.5364   | 0.709408    |
| item:eggcond:isen           | 139.1         | 34.8           | 4            | 50.148       | 0.1207   | 0.974464    |
| condition:item:eggcond:iacc | 743.8         | 185.9          | 4            | 82.075       | 0.6454   | 0.631695    |
| condition:item:eggcond:isen | 1504.4        | 376.1          | 4            | 77.720       | 1.3055   | 0.275386    |

**Table S11.** Model 4 type II analysis of variance table with Satterthwaite's method. *iacc*: interoceptive accuracy. *isen*: interoceptive sensibility. *eggcond*: EGG peak frequency. The blue row shows the interaction that was further analyzed through post-hoc tests. Significance codes as in table S2.

| <i>condition</i> | <i>sensibility</i>            | <i>EGG.trend</i> | <i>SE</i> | <i>df</i> | <i>lower.CL</i> | <i>upper.CL</i> | <i>t</i> | <i>p</i> |
|------------------|-------------------------------|------------------|-----------|-----------|-----------------|-----------------|----------|----------|
| <i>inc</i>       | <i>low</i> (-1 <i>S.D.</i> )  | 955              | 718       | 22.2      | -533            | 2444            | 1.331    | 0.1967   |
| <i>cong</i>      | <i>low</i> (-1 <i>S.D.</i> )  | 163              | 589       | 21.1      | -1061           | 1387            | 0.277    | 0.7842   |
| <i>inc</i>       | <i>average</i>                | -972             | 651       | 20.9      | -2326           | 383             | -1.492   | 0.1506   |
| <i>cong</i>      | <i>average</i>                | 362              | 419       | 20.1      | -511            | 1235            | 0.865    | 0.3975   |
| <i>inc</i>       | <i>high</i> (+1 <i>S.D.</i> ) | -2899            | 1053      | 21.5      | -5084           | -713            | -2.754   | 0.0117*  |
| <i>cong</i>      | <i>high</i> (+1 <i>S.D.</i> ) | 561              | 715       | 21.1      | -925            | 2047            | 0.784    | 0.4415   |

**Table S12.** Model 4 post-hoc analysis of the interaction between condition, sensibility, and EGG peak frequency. Degrees-of-freedom method: Kenward-Roger. Confidence level: 0.95.

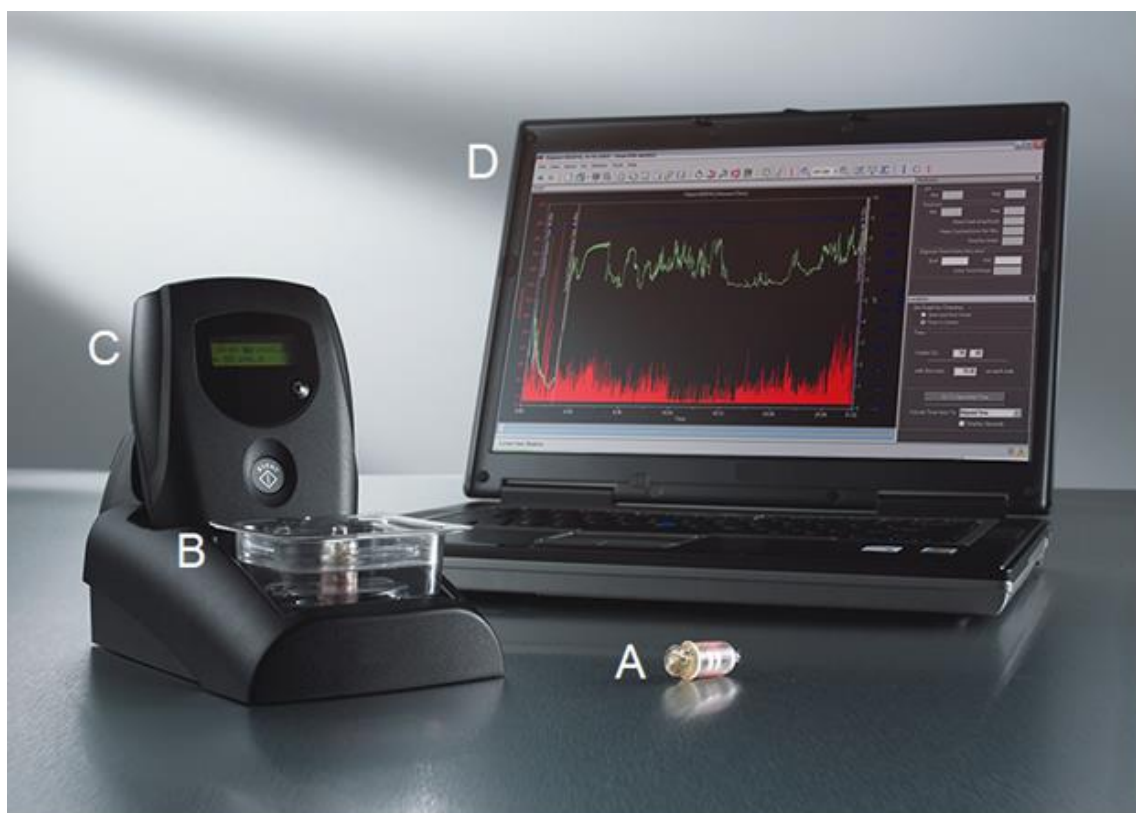

**Figure S1.** SmartPill apparatus. A: capsule. B: pH calibration buffer solution. C: data receiver and logger. D: laptop with graph showing pH (green line), temperature (blue line) and pressure (red bars) over time. Note the abrupt rise of the pH values in the left part of the screen, signaling the passage from the stomach to the small bowel, the slow build-up of the signal in the small bowel, and the rapid decrease marking the entrance of the pill in the large bowel. Adapted from a picture of Medtronic plc.

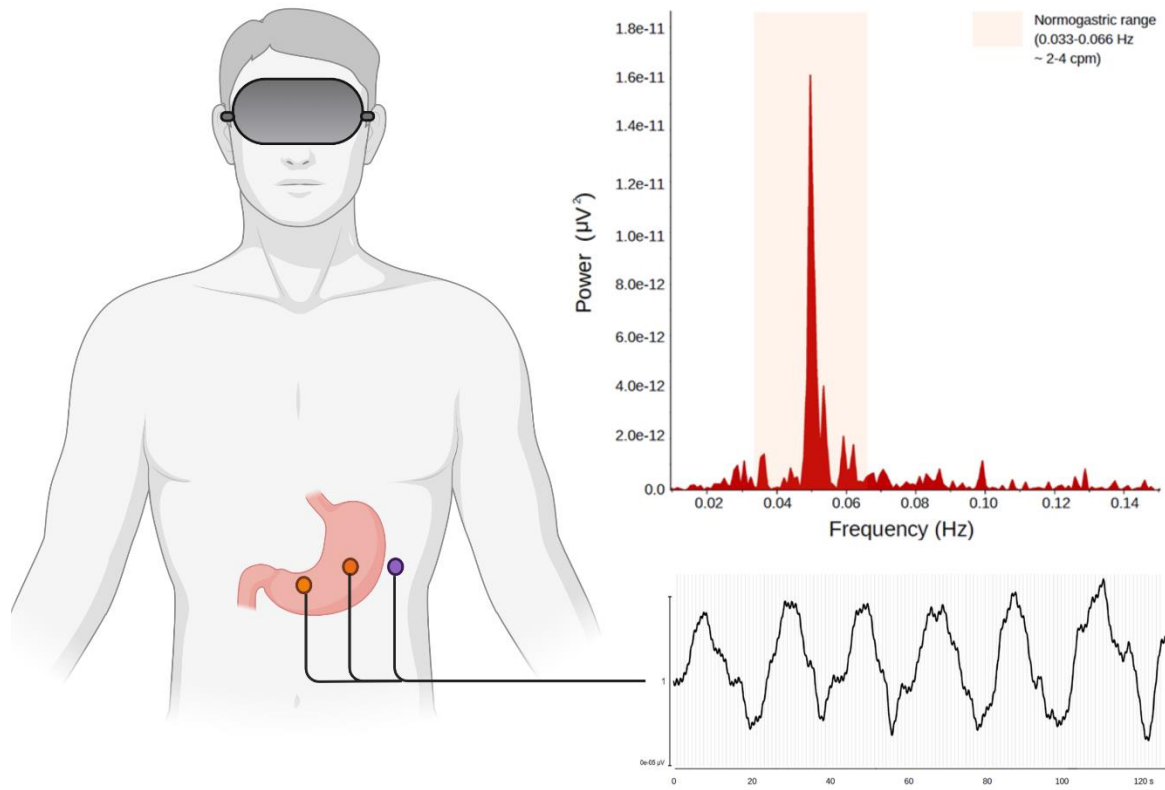

**Figure S2.** 1-channel EGG bipolar montage (left) with two recording electrodes (orange dots) and one ground electrode (purple dot), sample EGG recording (bottom right), and sample EGG periodogram (top right). Samples collected from a participant in our lab.

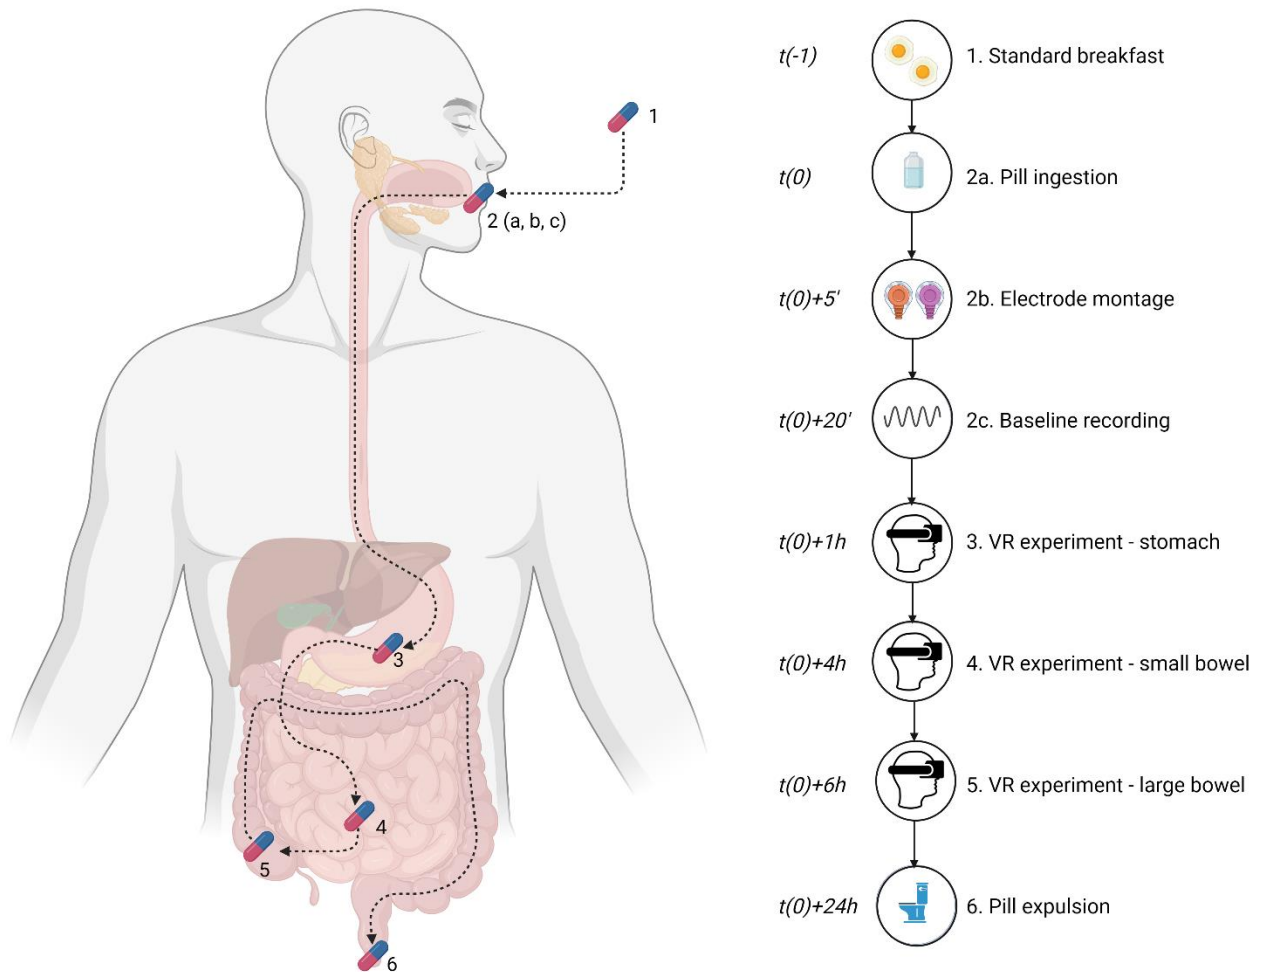

**Figure S3.** Timeline of the experimental procedures. *Italicized text indicates the approximate average time at which each event occurs.*

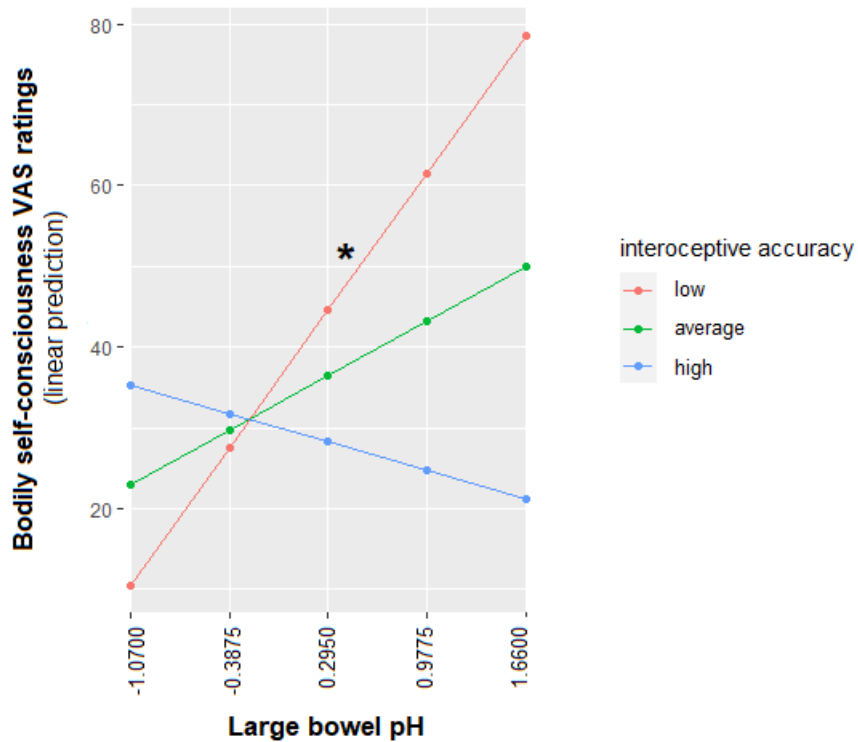

**Figure S4.** Effects of the large bowel pH and interoceptive accuracy across VAS ratings of bodily self-consciousness (estimated marginal means). ‘Low’ interoceptive accuracy indicates that results shown in red occur when accuracy is 1 standard deviation below the mean; ‘average’ indicates that results shown in green occur when accuracy is average; and ‘high’ indicates that results shown in blue occur when accuracy is 1 standard deviation above the mean.

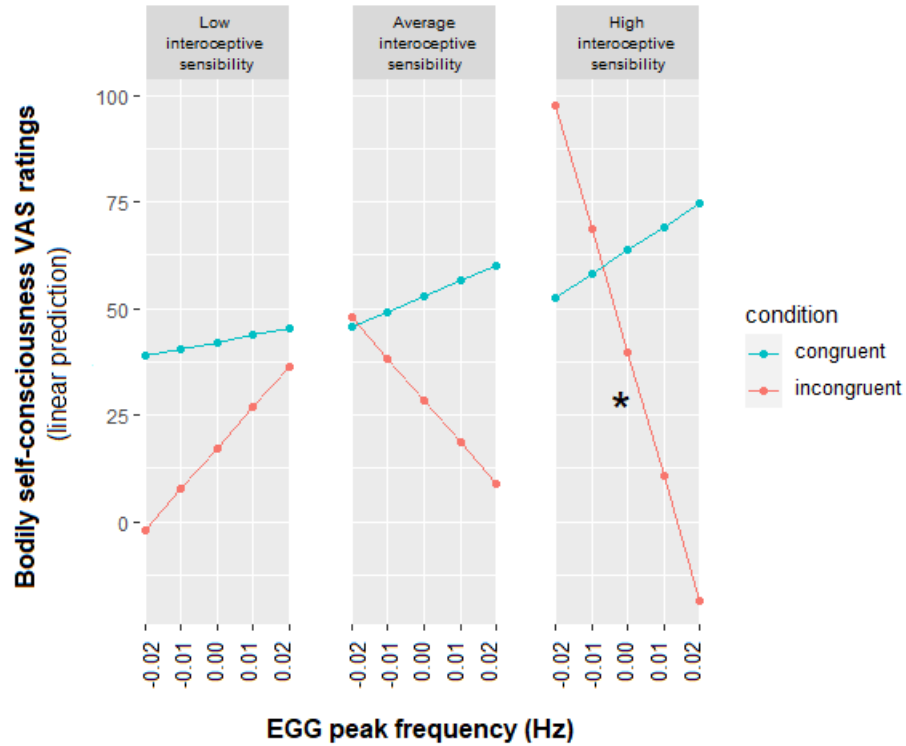

**Figure S5.** Electrogastrography (EGG) results. ‘Low’, ‘average’, and ‘high’ interoceptive sensibility are defined as in the main text.

**Movie S1.**

Movie describing each phase of the embreathment illusion. Available at <https://youtu.be/4zBx27OoIRE>
